# Supplementary material for: Analyzing Barriers and Enablers for the Acceptance of Artificial Intelligence Innovations into Radiology Practice: A Scoping Review
Source: MDPI journal article supplement (doi:10.3390/tomography9040115), 2023-07-28
Supplement: s1 [file s1]

# Analyzing Barriers and Enablers for the Acceptance of Artificial Intelligence Innovations into Radiology Practice: A Scoping Review

Fatma A. Eltawil <sup>1</sup>, Michael Atalla <sup>1</sup>, Emily Boulos <sup>1</sup>, Afsaneh Amirabadi <sup>2</sup> and Pascal N. Tyrrell <sup>1,3,4,\*</sup>

- <sup>1</sup> Department of Medical Imaging, University of Toronto, Toronto, ON M5S 1A1, Canada; fatma.eltawil@tyrrell4innovation.ca (F.A.E.); m2atalla@uwaterloo.ca (M.A.); emily.boulos@gmail.com (E.B.)  
<sup>2</sup> Diagnostic Imaging Department, The Hospital for Sick Children, Toronto, ON M5G 1E8, Canada; afsaneh.amirabadi@sickkids.ca  
<sup>3</sup> Department of Statistical Sciences, University of Toronto, Toronto, ON M5G 1Z5, Canada  
<sup>4</sup> Institute of Medical Science, University of Toronto, Toronto, ON M5S 1A8, Canada  
\* Correspondence: pascal.tyrrell@utoronto.ca; Tel.: 416-978-7941

## Supplementary Material

**Table S1: Medline search strategy**

| CAD                     |                                                                                                                                                                                                                                                                          |
|-------------------------|--------------------------------------------------------------------------------------------------------------------------------------------------------------------------------------------------------------------------------------------------------------------------|
| 1                       | exp diagnosis, computer-assisted/ or exp image interpretation, computer assisted/ or exp decision making, computer-assisted/                                                                                                                                             |
| 2                       | computer-aided diagnosis.mp.                                                                                                                                                                                                                                             |
| 3                       | exp Radiographic Image Interpretation, Computer-Assisted/                                                                                                                                                                                                                |
| 4                       | exp Diagnostic Imaging/                                                                                                                                                                                                                                                  |
| 5                       | exp Radiology Information Systems/                                                                                                                                                                                                                                       |
| 6                       | "Attitude of Health Personnel"/                                                                                                                                                                                                                                          |
| 7                       | exp Attitude to Computers/                                                                                                                                                                                                                                               |
| 8                       | Radiologist.mp.                                                                                                                                                                                                                                                          |
| 9                       | evaluation.mp.                                                                                                                                                                                                                                                           |
| 10                      | (computer-aided detection and diagnosis systems).mp. [mp=title, abstract, original title, name of substance word, subject heading word, keyword heading word, protocol supplementary concept word, rare disease supplementary concept word, unique identifier, synonyms] |
| 11                      | (quality assurance and training procedures).mp. [mp=title, abstract, original title, name of substance word, subject heading word, keyword heading word, protocol supplementary concept word, rare disease supplementary concept word, unique identifier, synonyms]      |
| 12                      | computer-hindered.mp.                                                                                                                                                                                                                                                    |
| 13                      | (junior radiologist or senior radiologist).mp. [mp=title, abstract, original title, name of substance word, subject heading word, keyword heading word, protocol supplementary concept word, rare disease supplementary concept word, unique identifier, synonyms]       |
| 14                      | radiologist's experience.mp.                                                                                                                                                                                                                                             |
| 15                      | laboratory to the clinic.mp.                                                                                                                                                                                                                                             |
| 16                      | 1 or 2 or 3 or 4 or 5                                                                                                                                                                                                                                                    |
| Artificial intelligence |                                                                                                                                                                                                                                                                          |
| 1                       | exp Radiographic Image Interpretation, Computer-Assisted/ and exp Radiology/ and exp Artificial Intelligence/                                                                                                                                                            |

---

2 exp Artificial Intelligence/ and exp Radiology/ and exp Decision Making/

---

**Table S2: Embase search strategy**

---

**CAD**

---

- |    |                                                                                   |
|----|-----------------------------------------------------------------------------------|
| 1  | exp computer assisted diagnosis/                                                  |
| 2  | computer aided diagnosis.mp.                                                      |
| 3  | exp diagnostic imaging/                                                           |
| 4  | radiology information systems.mp.                                                 |
| 5  | exp health personnel attitude                                                     |
| 6  | exp attitude to computers/                                                        |
| 7  | exp radiology/ or exp radiologist/                                                |
| 8  | evaluation.mp. or exp evaluation study/                                           |
|    | (computer-aided detection and diagnosis systems).mp. [mp=title, abstract, heading |
| 9  | word, drug trade name, original title, device manufacturer, drug manufacturer,    |
|    | device trade name, keyword, floating subheading word]                             |
|    | (quality assurance and training procedures). mp. [mp=title, abstract, heading     |
| 10 | word, drug trade name, original title, device manufacturer, drug manufacturer,    |
|    | device trade name, keyword, floating subheading word]                             |
| 11 | computer-hindered.mp.                                                             |
|    | (Junior radiologist or senior radiologist).mp. [mp=title, abstract, heading word, |
| 12 | drug trade name, original title, device manufacturer, drug manufacturer, device   |
|    | trade name, keyword, floating subheading word]                                    |
| 13 | radiologist's experience.mp.                                                      |
| 14 | laboratory to the clinic.mp.                                                      |
| 15 | 1 or 2 or 3 or 4                                                                  |
| 16 | Computer-aided diagnosis in radiology.mp.                                         |
- 

**Artificial intelligence**

---

- |   |                                                                              |
|---|------------------------------------------------------------------------------|
| 1 | exp Radiographic Image Interpretation, Computer-Assisted/ and exp Radiology/ |
|   | and exp Artificial Intelligence/                                             |
| 2 | exp Artificial Intelligence/ and exp Radiology/ and exp Decision Making/     |
-
